# Supplementary material for: Loss of Atypical Chemokine Receptors Expression Promotes Lymph Node Metastasis of Colorectal Cancer
Source: Research Square preprint supplement (doi:10.21203/rs.3.rs-150865/v1), 2021-01-21
Supplement: Supplementary file 1 [file 2cd09a8f63d1e166258b5cf7.docx]

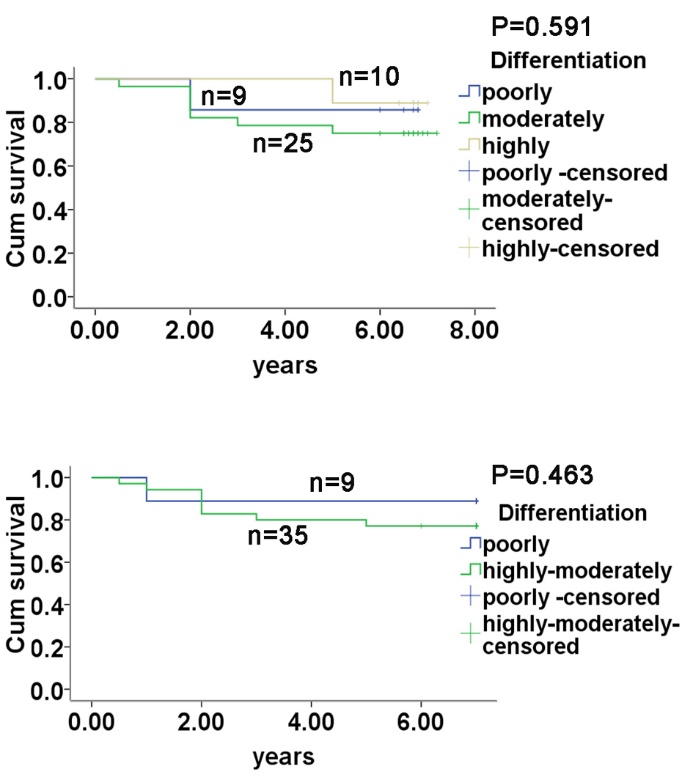


Figure S3. **Cumulative survival curves for the grades of tumor differentiation.** The 44 patients were divided into two (poorly and moderately-highly differentiated, upper panel) or three subgroups (poorly, moderately and highly differentiated, lower panel), there was no significant difference in cumulative survival relevant to the differentiation status.
